# Supplementary material
Source: MDPI journal article supplement (https://www.mdpi.com/2071-1050/15/24/16799)
Supplement: s1 [file s1]

**Supplementary Table S1. Strategic Goals of the Universities in Turkey**

| Universities                     |          | Strategic Plans Announced in their Official Web Site                                                                                  |
|----------------------------------|----------|---------------------------------------------------------------------------------------------------------------------------------------|
| Koç University                   | KU SP1   | Research                                                                                                                              |
|                                  | KU SP2   | Education                                                                                                                             |
|                                  | KU SP3   | Management                                                                                                                            |
|                                  | KU SP4   | Social Contribution                                                                                                                   |
| Middle East Technical University | METU SP1 | Sustainably improving the quality of education for national and international students                                                |
|                                  | METU SP2 | Developing sustainable, innovative research studies that can adapt to changes and needs at national and international scales          |
|                                  | METU SP3 | To create and maintain a qualified academic and administrative workforce                                                              |
|                                  | METU SP4 | Prioritizing and empowering corporate resources                                                                                       |
|                                  | METU SP5 | Maintaining the university's social contribution impact and internationalization capacity by strengthening                            |
| Sabanci University               | SU SP1   | Increasing Impact on Focused Global Issues and SDG                                                                                    |
|                                  | SU SP2   | Increasing the impact of research on society                                                                                          |
|                                  | SU SP3   | Increasing contribution to social transformation with trained competencies and values                                                 |
|                                  | SU SP4   | Developing strategic human resources, organizational capacity and high performance team culture                                       |
|                                  | SU SP5   | New and balanced financial structure                                                                                                  |
| Istanbul Technical University    | ITU SP1  | Strengthening education and training with innovative and dynamic approaches                                                           |
|                                  | ITU SP2  | Contributing to scientific and technological developments through qualified research to create value for our country                  |
|                                  | ITU SP3  | To take an active role in social, cultural, scientific and technological fields in a way to inform and raise awareness of the society |
|                                  | ITU SP4  | Developing a corporate structure that embraces continuous improvement and ensuring digital transformation                             |

|                      |         |                                                                                                                                                                     |
|----------------------|---------|---------------------------------------------------------------------------------------------------------------------------------------------------------------------|
|                      | ITU SP5 | To make our university an institution that plays an active role in the international arena and is preferred                                                         |
| Boğaziçi University  | BOU SP1 | Strengthening education and training activities and enriching them with innovative/creative approaches                                                              |
|                      | BOU SP2 | Strengthening research, innovation culture and entrepreneurship in line with the identity of a research university, increasing research resources and effectiveness |
|                      | BOU SP3 | Improving campus life to increase staff and student satisfaction                                                                                                    |
|                      | BOU SP4 | Developing institutional capacity to increase service quality and efficiency                                                                                        |
|                      | BOU SP5 | Strengthening social responsibility and community service activities                                                                                                |
| Hacettepe University | HU SP1  | Strengthening the quality of education and training with technological, dynamic and sustainable approaches                                                          |
|                      | HU SP2  | Strengthening the quality of “Research University”                                                                                                                  |
|                      | HU SP3  | Strengthening the entrepreneurial ecosystem                                                                                                                         |
|                      | HU SP4  | Developing quality-oriented institutional capacity                                                                                                                  |
|                      | HU SP5  | To improve the scope and quality of community service                                                                                                               |
| Istanbul University  | IS SP1  | Continuous development of human, socio-technical and physical capital potential                                                                                     |
|                      | IS SP2  | Bringing education-training activities to international standards with a student-centered model                                                                     |
|                      | IS SP3  | Increasing the research infrastructure and qualified scientific studies to an international competitive level and ensuring sustainability                           |
|                      | IS SP4  | Integrating academic outcomes with community service by increasing collaboration with civil society                                                                 |
|                      | IS SP5  | Increasing entrepreneurship and innovation activities and projects transforming into economic and social values                                                     |
| Ankara University    | AU SP1  | Sustaining Research University status                                                                                                                               |
|                      | AU SP2  | Increasing accredited education programs and producing qualified graduates                                                                                          |
|                      | AU SP3  | To increase the quality of the services offered in cooperation with its stakeholders                                                                                |
|                      | AU SP4  | Developing University-Industry Cooperation                                                                                                                          |
|                      | AU SP5  | Strengthening the institutional structure in all campuses of the university                                                                                         |
| Gazi University      | GU SP1  | Increasing the quality of education and training, expanding internationalization and accreditation                                                                  |

|                             |         |                                                                                                                                       |
|-----------------------------|---------|---------------------------------------------------------------------------------------------------------------------------------------|
|                             | GU SP2  | Carrying out high-quality and value-added research and development studies that will strengthen the vision of the Research University |
|                             | GU SP3  | Encouraging and disseminating entrepreneurial activities                                                                              |
|                             | GU SP4  | To contribute to society by increasing social responsibility awareness and service quality                                            |
|                             | GU SP5  | Strengthening institutionalization within the framework of national and international norms                                           |
| Istanbul Aydin University   | IAU SP1 | To be International level brand                                                                                                       |
|                             | IAU SP2 | To ensure continuous improvement and learning                                                                                         |
|                             | IAU SP3 | To diversify and increase university income                                                                                           |
|                             | IAU SP4 | Operational improvement                                                                                                               |
| Yildiz Technical University | YTU SP1 | Being a leading university in research and development                                                                                |
|                             | YTU SP2 | Being a leading university in higher education and training with digital capacity                                                     |
|                             | YTU SP3 | Excelling in institutionalism and ensuring its sustainability                                                                         |
|                             | YTU SP4 | Pioneering efforts to improve the quality of life of the society                                                                      |
| Akdeniz University          | AKU SP1 | Improving research activities                                                                                                         |
|                             | AKU SP2 | Increasing Entrepreneurial Activities                                                                                                 |
|                             | AKU SP3 | Developing educational activities                                                                                                     |
|                             | AKU SP4 | Increasing social contribution                                                                                                        |
|                             | AKU SP5 | Developing institutional capacity                                                                                                     |
| Anadolu University          | ANU SP1 | Continuous improvement of the quality of educational activities                                                                       |
|                             | ANU SP2 | Increasing the quantity, quality and diversity in research activities                                                                 |
|                             | ANU SP3 | Diversification of cooperation and activities that create value within the framework of social responsibility and dissemination       |
|                             | ANU SP4 | Continuous improvement of the quality of the open and distance learning system                                                        |
|                             | ANU SP5 | Strengthening the effective and efficient management system in line with the principles of institutionalization                       |
|                             | ANU SP6 | Spreading the entrepreneurial culture                                                                                                 |
| Dokuz Eylül University      | DEU SP1 | Develop scientific and innovative research capacity                                                                                   |
|                             | DEU SP2 | Developing education and training capacity                                                                                            |
|                             | DEU SP3 | Strengthening institutional capacity, improving interaction with stakeholders and quality of community service                        |

|                               |          |                                                                                                                                                                      |
|-------------------------------|----------|----------------------------------------------------------------------------------------------------------------------------------------------------------------------|
| Ege University                | EU SP1   | To contribute to the regional, country and world economy by improving the research environment of Ege University                                                     |
|                               | EU SP2   | Continuing education activities at national and international standards                                                                                              |
|                               | EU SP3   | To make Ege University a center of attraction in the field of international higher education                                                                         |
|                               | EU SP4   | To ensure the sustainability and development of the corporate structure                                                                                              |
|                               | EU SP5   | Ensuring the transformation of education and research outputs into contributions to society                                                                          |
| Istanbul Bilgi University     | IBU SP1  | Enterprise Features and Development                                                                                                                                  |
|                               | IBU SP2  | Education and Training                                                                                                                                               |
|                               | IBU SP3  | Research, Development and Innovation                                                                                                                                 |
|                               | IBU SP4  | Community Service                                                                                                                                                    |
|                               | IBU SP5  | Administrative and Support Services                                                                                                                                  |
|                               | IBU SP6  | Governance                                                                                                                                                           |
| Izmir Institute of Technology | IZTU SP1 | Scientific research                                                                                                                                                  |
|                               | IZTU SP2 | Innovation Ecosystem                                                                                                                                                 |
|                               | IZTU SP3 | Education and Training                                                                                                                                               |
|                               | IZTU SP4 | Institutional development and social contribution                                                                                                                    |
| Marmara University            | MU SP1   | To make the quality of education internationally competitive by expanding accreditation                                                                              |
|                               | MU SP2   | To improve the quality and quality of research, interaction and cooperation of the university in a way that supports its vision of being a research university       |
|                               | MU SP3   | Strengthening research and development capacity and infrastructure                                                                                                   |
|                               | MU SP4   | Ensuring the transformation of education and research outputs into social contributions                                                                              |
|                               | MU SP5   | Increasing institutional capacity and improving corporate culture                                                                                                    |
| Ataturk University            | ATU SP1  | To provide innovative, entrepreneurial and competitive graduates with high scientific power by offering qualified education and training activities in all its units |
|                               | ATU SP2  | To maximize Research and Entrepreneurship activities that will add value to the regional and national economy and contribute to universal science                    |
|                               | ATU SP3  | Being sensitive to social demands and giving direction to these demands                                                                                              |
|                               | ATU SP4  | Strengthening institutionalization                                                                                                                                   |
| Cukurova University           | ATU SP1  | To ensure the production of innovative products, processes and services by producing qualified information                                                           |

|                    |        |                                                                                                                                                                                                                                                                                                                                                    |
|--------------------|--------|----------------------------------------------------------------------------------------------------------------------------------------------------------------------------------------------------------------------------------------------------------------------------------------------------------------------------------------------------|
|                    | CU SP2 | Developing the quality of education in order to raise innovative, entrepreneurial, productive and questioning human power compatible with the needs of the age                                                                                                                                                                                     |
|                    | CU SP3 | Developing our university's relations at regional, country and international levels and increasing its social contribution                                                                                                                                                                                                                         |
|                    | CU SP4 | To develop the entrepreneurial structure of the university within the framework of TÜBİTAK's Entrepreneurial and Innovative University Index                                                                                                                                                                                                       |
|                    | CU SP5 | Developing institutional capacity                                                                                                                                                                                                                                                                                                                  |
| Erciyes University | EU SP1 | To improve the quality of educational activities                                                                                                                                                                                                                                                                                                   |
|                    | EU SP2 | To be among the top 10 public universities in Turkey in international and national ranking systems with R&D content                                                                                                                                                                                                                                |
|                    | EU SP3 | Developing local/regional/national/international social contribution practices                                                                                                                                                                                                                                                                     |
|                    | EU SP4 | To be a leading university in scientific, innovative, agile and people-oriented corporate management practices                                                                                                                                                                                                                                     |
|                    | EU SP5 | To be a leading University in the national and international arena in the realization of sustainable development goals                                                                                                                                                                                                                             |
| Sakarya University | SU SP1 | Supporting students and educators to gain 21st century skills, to be able to transform the knowledge gained through student-centered education programs that support learning into practice, to gain lifelong learning skills in order to graduate students with the required competencies and promoting the spread of internationalization        |
|                    | SU SP2 | To develop graduate education programs in a way that supports research and development by considering the needs and potentials of the country, and to encourage successful students to graduate education                                                                                                                                          |
|                    | SU SP3 | Transforming the knowledge and research potential of the university into research and development activities with the cooperation of national and international stakeholders and industry, and into outputs aimed at solving the problems of the industry and society and transforming it into high value-added socio-economic and social benefits |
|                    | SU SP4 | To develop of education including sanitary conditions, renewable energy, human focused social development, reduction of inequalities, human development, responsible consumption and production, environmental protection and to carry out sensitive practices in the fields of education, health, social and environment                          |

|                                |         |                                                                                                                                                                                        |
|--------------------------------|---------|----------------------------------------------------------------------------------------------------------------------------------------------------------------------------------------|
|                                | SU SP5  | By strengthening the university's relations with its internal and external stakeholders, accountability in public administration, economic securing sustainability and service quality |
| Gebze Technical University     | GTU SP1 | To strengthen the quality of being a research-oriented university                                                                                                                      |
|                                | GTU SP2 | To ensure that the quality of education services is offered at national and international standards                                                                                    |
|                                | GTU SP3 | Strengthening the interaction with society and the environment by increasing service quality and capacity and social responsibility awareness                                          |
| İstanbul-Cerrahpaşa University | IUC SP1 | Improving the quality of education and training                                                                                                                                        |
|                                | IUC SP2 | Conducting interdisciplinary and output-oriented research                                                                                                                              |
|                                | IUC SP3 | Strengthening and supporting entrepreneurial activities                                                                                                                                |
|                                | IUC SP4 | Education, research, sustainability in health services and being accessible to all segments of society                                                                                 |
|                                | IUC SP5 | Developing Institutional Capacity                                                                                                                                                      |
| Bursa Uludağ University        | BUU SP1 | Raising individuals with a universal perspective, critical thinking and problem solving skills with qualified education                                                                |
|                                | BUU SP2 | Transforming outputs into social and economic benefit by conducting original and qualified scientific research                                                                         |
|                                | BUU SP3 | Developing social contribution with social responsibility and sustainability awareness                                                                                                 |
|                                | BUU SP4 | Strengthening corporate culture by increasing corporate belonging                                                                                                                      |
| Fırat University               | FU SP1  | The administrative structure of our Presidency will be re-examined after the business analysis and the deficiencies in the technological field will be tried to be eliminated          |
|                                | FU SP2  | Giving importance to In-service training and the performance of staff as a basis in evaluations and promotions                                                                         |
|                                | FU SP3  | Within the e-government project, our information will be shared with other public institutions and organizations                                                                       |
|                                | FU SP4  | With the information in the database, information that will pave the way for the management will be produced can be done                                                               |
| Karadeniz Technical University | KTU SP1 | To educate and graduate students for change and development by improving the quality of education                                                                                      |
|                                | KTU SP2 | Developing research capacity for innovative production                                                                                                                                 |

|  |         |                                                                   |
|--|---------|-------------------------------------------------------------------|
|  | KTU SP3 | Increasing corporate capacity and disseminating corporate culture |
|  | KTU SP4 | Being sensitive to social problems and being solution-oriented    |
|  | KTU SP5 | Internationalize                                                  |

**Supplementary Table S2. How many objectives relating to SDGs contained in the Strategic Plans?**

|                                             | <i>Strategic<br/>Goals of the<br/>Universities</i> | <i>How many<br/>times<br/>matched with<br/>SDGs</i> | <i>The number<br/>of objectives<br/>contained in<br/>the SDGs</i> |
|---------------------------------------------|----------------------------------------------------|-----------------------------------------------------|-------------------------------------------------------------------|
| <i>Middle East Technical<br/>University</i> | 1                                                  | 1                                                   | 12                                                                |
|                                             | 2                                                  | 3                                                   |                                                                   |
|                                             | 3                                                  | 4                                                   |                                                                   |
|                                             | 4                                                  | 3                                                   |                                                                   |
|                                             | 5                                                  | 1                                                   |                                                                   |
| <i>Koç University</i>                       | 1                                                  | 2                                                   | 9                                                                 |
|                                             | 2                                                  | 2                                                   |                                                                   |
|                                             | 3                                                  | 0                                                   |                                                                   |
|                                             | 4                                                  | 5                                                   |                                                                   |
| <i>Sakarya University</i>                   | 1                                                  | 1                                                   | 9                                                                 |
|                                             | 2                                                  | 1                                                   |                                                                   |
|                                             | 3                                                  | 1                                                   |                                                                   |
|                                             | 4                                                  | 5                                                   |                                                                   |
|                                             | 5                                                  | 1                                                   |                                                                   |
| <i>Istanbul Technical University</i>        | 1                                                  | 3                                                   | 8                                                                 |
|                                             | 2                                                  | 1                                                   |                                                                   |
|                                             | 3                                                  | 1                                                   |                                                                   |
|                                             | 4                                                  | 1                                                   |                                                                   |
|                                             | 5                                                  | 2                                                   |                                                                   |
| <i>Istanbul University</i>                  | 1                                                  | 2                                                   | 7                                                                 |
|                                             | 2                                                  | 1                                                   |                                                                   |
|                                             | 3                                                  | 1                                                   |                                                                   |
|                                             | 4                                                  | 2                                                   |                                                                   |
|                                             | 5                                                  | 1                                                   |                                                                   |
| <i>Ankara Üniversitesi</i>                  | 1                                                  | 1                                                   | 7                                                                 |
|                                             | 2                                                  | 1                                                   |                                                                   |
|                                             | 3                                                  | 3                                                   |                                                                   |



|                                      |   |   |   |
|--------------------------------------|---|---|---|
|                                      | 4 | 1 |   |
|                                      | 5 | 1 |   |
| <i>Boğaziçi University</i>           | 1 | 1 | 6 |
|                                      | 2 | 2 |   |
|                                      | 3 | 2 |   |
|                                      | 4 | 0 |   |
|                                      | 5 | 1 |   |
| <i>Hacettepe University</i>          | 1 | 3 | 6 |
|                                      | 2 | 0 |   |
|                                      | 3 | 0 |   |
|                                      | 4 | 0 |   |
|                                      | 5 | 3 |   |
| <i>Ege University</i>                | 1 | 2 | 6 |
|                                      | 2 | 1 |   |
|                                      | 3 | 1 |   |
|                                      | 4 | 1 |   |
|                                      | 5 | 1 |   |
| <i>Erciyes University</i>            | 1 | 1 | 6 |
|                                      | 2 | 1 |   |
|                                      | 3 | 2 |   |
|                                      | 4 | 1 |   |
|                                      | 5 | 1 |   |
| <i>Gazi University</i>               | 1 | 1 | 5 |
|                                      | 2 | 0 |   |
|                                      | 3 | 1 |   |
|                                      | 4 | 2 |   |
|                                      | 5 | 1 |   |
| <i>Istanbul Bilgi University</i>     | 1 | 1 | 5 |
|                                      | 2 | 1 |   |
|                                      | 3 | 1 |   |
|                                      | 4 | 2 |   |
|                                      | 5 | 0 |   |
|                                      | 6 | 0 |   |
| <i>Izmir Institute of Technology</i> | 1 | 1 | 5 |

|                                    |   |   |   |
|------------------------------------|---|---|---|
|                                    | 2 | 1 |   |
|                                    | 3 | 1 |   |
|                                    | 4 | 2 |   |
| <i>Marmara University</i>          | 1 | 1 | 5 |
|                                    | 2 | 1 |   |
|                                    | 3 | 1 |   |
|                                    | 4 | 1 |   |
|                                    | 5 | 1 |   |
| <i>Cukurova University</i>         | 1 | 1 | 5 |
|                                    | 2 | 1 |   |
|                                    | 3 | 1 |   |
|                                    | 4 | 1 |   |
|                                    | 5 | 1 |   |
| <i>Bursa Uludağ University</i>     | 1 | 1 | 5 |
|                                    | 2 | 1 |   |
|                                    | 3 | 2 |   |
|                                    | 4 | 1 |   |
| <i>Gebze Technical University</i>  | 1 | 2 | 4 |
|                                    | 2 | 1 |   |
|                                    | 3 | 1 |   |
| <i>Sabancı University</i>          | 1 | 1 | 4 |
|                                    | 2 | 0 |   |
|                                    | 3 | 1 |   |
|                                    | 4 | 1 |   |
|                                    | 5 | 1 |   |
| <i>Yıldız Technical University</i> | 1 | 1 | 4 |
|                                    | 2 | 1 |   |
|                                    | 3 | 1 |   |
|                                    | 4 | 1 |   |
| <i>Akdeniz University</i>          | 1 | 0 | 4 |
|                                    | 2 | 1 |   |
|                                    | 3 | 1 |   |
|                                    | 4 | 2 |   |
|                                    | 5 | 0 |   |

|                                       |   |   |   |
|---------------------------------------|---|---|---|
| <i>Dokuz Eylül University</i>         | 1 | 2 | 4 |
|                                       | 2 | 1 |   |
|                                       | 3 | 1 |   |
| <i>Ataturk University</i>             | 1 | 1 | 4 |
|                                       | 2 | 1 |   |
|                                       | 3 | 2 |   |
|                                       | 4 | 0 |   |
| <i>Anadolu University</i>             | 1 | 1 | 3 |
|                                       | 2 | 0 |   |
|                                       | 3 | 0 |   |
|                                       | 4 | 1 |   |
|                                       | 5 | 0 |   |
|                                       | 6 | 1 |   |
| <i>İstanbul University Cerrahpaşa</i> | 1 | 1 | 3 |
|                                       | 2 | 0 |   |
|                                       | 3 | 0 |   |
|                                       | 4 | 2 |   |
|                                       | 5 | 0 |   |
| <i>Karadeniz Technical University</i> | 1 | 1 | 3 |
|                                       | 2 | 1 |   |
|                                       | 3 | 0 |   |
|                                       | 4 | 1 |   |
|                                       | 5 | 0 |   |
| <i>Istanbul Aydın University</i>      | 1 | 1 | 2 |
|                                       | 2 | 1 |   |
|                                       | 3 | 0 |   |
|                                       | 4 | 0 |   |
| <i>Fırat University</i>               | 1 | 0 | 0 |
|                                       | 2 | 0 |   |
|                                       | 3 | 0 |   |
|                                       | 4 | 0 |   |
